# Supplementary material for: Optimization of over-summer snow storage at mid-latitude and low elevation
Source: Copernicus journal article supplement (doi:10.5194/tc-2019-56), 2019-04-11
Supplement: Supplementary file [file tc-2019-56-RC3-supplement.pdf]

Tab. 7.1: Übersicht über bekannte Snowfarming-Projekte<sup>B</sup>.

| Ort  |                            | Abdeckung |                                    | Ertrag                    |             |
|------|----------------------------|-----------|------------------------------------|---------------------------|-------------|
| Land | Gemeinde                   | m o. M.   | Material                           | Volumen [m <sup>3</sup> ] | Verlust [%] |
| AT   | St. Jakob im Walde         | 1150      | Sägespäne                          | 2700                      | 26          |
| AT   | Ramsau                     | 1100      | Hackschnitzel / LKW-Plane          | 20000                     | 40          |
| AT   | St. Gallenkirch (Montafon) | 2080      | Folie                              | 15000                     | 80          |
| AT   | Seefeld (Tirol)            | 1200      | Hackschnitzel                      | 5000                      | 40          |
| AT   | Hochfilzen                 | 960       | Vlies                              | 8000                      | k. A.       |
| AT   | Reiteralm                  | 2100      | Stroh                              | k. A.                     | k. A.       |
| AT   | Saalbach-Hinterglemm       | 1000      | Hackschnitzel / Vlies / Folie      | 15000                     | 17          |
| AT   | Hermagor                   | 1200      | Stroh                              | 400                       | 25          |
| AT   | Kitzbühel                  | 1900      | Isolierplatten / Silofolie / Vlies | 25000                     | 20          |
| CAN  | Canmore Nordic Centre      | 1380      | Sägespäne                          | k. A.                     | k. A.       |
| CH   | Davos (altes Depot)        | 1650      | Sägespäne                          | 6900                      | 22          |
| CH   | Davos                      | 1650      | Sägespäne                          | 16000                     | 16          |
| CH   | Disentis                   | 2600      | Vlies                              | k. A.                     | k. A.       |
| CH   | Davos Jakobshorn           | 2600      | Vlies                              | 20500                     | 57          |
| CH   | Engelberg                  | 1050      | Hackschnitzel                      | 600                       | k. A.       |
| D    | Ruhpolding                 | 700       | Isolierplatten / Silofolie / Tape  | 10850                     | 30          |
| D    | Neustadt                   | 820       | Isolierplatten / Folie             | 10000                     | 20          |
| D    | Klingenthal                | 569       | Sägespäne                          | 16000                     | k. A.       |
| D    | Oberhof                    | 815       | Isolierplatten / Folie             | 10000                     | k. A.       |
| FIN  | Ruka                       | 400       | Sägespäne / Vlies                  | 30000*                    | k. A.       |
| FIN  | Vuokatti                   | etwa 100  | Sägespäne                          | 20000                     | 20          |
| IT   | Livigno                    | 1800      | Sägespäne / Vlies                  | 70000                     | 25          |
| IT   | Corvara                    | 1900      | Steinbach S500T-550                | 6000                      | 50          |
| IT   | Martell                    | 1700      | Hackschnitzel                      | 7140                      | 33          |
| IT   | Watles                     | 2300      | Isolierplatten / Silofolie / Vlies | 25000                     | 20          |
| NOR  | Söderhamn                  | etwa 100  | Rinde                              | k. A.                     | k. A.       |
| NOR  | Dovre                      | 700       | Hackschnitzel                      | 10000                     | k. A.       |
| NOR  | Beitostølen                | 820       | Sägespäne                          | 18000                     | 22          |
| NOR  | Trondheim                  | 180       | Isolierplatten                     | 18000                     | 22          |
| NOR  | Geilo                      | etwa 1000 | Vlies / Sägespäne oder Stroh       | k. A.                     | k. A.       |
| RUS  | Rosa Khutor                | 1600      | Vlies / Isoliermatte               | 800000*                   | 20-50       |
| SE   | Östersund                  | 372       | Sägespäne                          | 55200*                    | 24          |
| SE   | Orsa                       | etwa 100  | Rinde                              | 5000                      | k. A.       |
| SE   | Piteå                      | etwa 100  | Rinde / Vlies                      | 3400                      | 30          |
| SE   | Arjeplog                   | etwa 100  | Rinde / Vlies                      | 1600                      | 60          |

\* Gesamtvolumen in mehrere Haufen aufgeteilt

<sup>B</sup> Gletscherabdeckungen sind hier nicht aufgeführt. Sie werden jedoch im Alpenraum intensiv eingesetzt (z. B. Kaunertal, Pitztal, Sölden, Diavolezza, Gemsstock, Saas Fee, Vorabgletscher usw.).
